# Supplementary material for: Epidemiology of bronchiectasis
Source: PubMed Central journal article supplement — Eur Respir Rev. 2024 Oct 9;33(174):240091. doi: 10.1183/16000617.0091-2024 (PMC11462313; doi:10.1183/16000617.0091-2024), 2024-10-09
Supplement: ERR-0091-2024.SUPPLEMENT.pdf [file ERR-0091-2024.SUPPLEMENT.pdf]

## **Epidemiology of bronchiectasis – Online supplements**

### **Authors**

Mattia Nigro MD<sup>1,2</sup>, Irena F. Laska MBBS<sup>3</sup>, Letizia Traversi MD<sup>4</sup>, Edoardo Simonetta MD<sup>2</sup>, Eva Polverino MD PhD<sup>4</sup>.

### **Affiliations**

1. Department of Biomedical Sciences, Humanitas University, Via Rita Levi Montalcini 4, 20072, Pieve Emanuele, Milan, Italy.
2. IRCCS Humanitas Research Hospital, Respiratory Unit, Via Manzoni 56, 20089, Rozzano, Milan, Italy.
3. Department of Respiratory and Sleep Disorders Medicine, Western Health, 160 Gordon St, Footscray, Victoria 3011, Australia.
4. Pneumology Department, Hospital Universitari Vall d'Hebron, Vall d'Hebron Institut de Recerca (VHIR), Vall d'Hebron Barcelona Hospital Campus, CIBERES, Barcelona, Spain.

### **Corresponding author**

Mattia Nigro, Department of Biomedical Sciences, Humanitas University, Via Rita Levi Montalcini 4, 20072, Pieve Emanuele, Milan, Italy. IRCCS Humanitas Research Hospital, Respiratory Unit, Via Manzoni 56, 20089, Rozzano, Milan, Italy. Email: [mattia.nigro@humanitas.it](mailto:mattia.nigro@humanitas.it).

Table S1: Frequency of aetiological testing in published series. ABPA: Allergic Bronchopulmonary Aspergillosis. PCD: Primary Ciliary Dyskinesia.

| Author, year                   | Type of study | Country     | Patients included (n) | Testing for immunoglobulins (%) | Testing for ABPA (%) | Testing for PCD (%) |
|--------------------------------|---------------|-------------|-----------------------|---------------------------------|----------------------|---------------------|
| <b>Schoovaerts, 2019</b> [128] | Audit         | Belgium     | 186                   | 84                              | 62                   | -                   |
| <b>Hill, 2014</b> [129]        | Audit         | UK          | 3147                  | 68                              | 63                   | -                   |
| <b>Shoemark, 2022</b> [131]    | Audit         | UK          | 4898                  | -                               | -                    | 1                   |
| <b>Kim, 2021</b> [136]         | Survey        | Japan       | -                     | 31.4                            | 52.9                 | -                   |
|                                |               | South Korea | -                     | 9.9                             | 6.3                  | -                   |
|                                |               | Singapore   | -                     | 52.9                            | 41.2                 | -                   |
|                                |               | Taiwan      | -                     | 0                               | 0                    | -                   |
| <b>Dhar, 2019</b> [7]          | Registry      | India       | 2195                  | 3.7                             | 17                   | -                   |

Table S2: Use of inhaled/nebulized antibiotics in published series.

| Author, year              | Country/Continent           | Type of study | Patients included (n) | Patients treated with inhaled antibiotics (%) | Centres/ Responders disposing of inhaled antibiotics (%) |
|---------------------------|-----------------------------|---------------|-----------------------|-----------------------------------------------|----------------------------------------------------------|
| <b>Chalmers, 2023</b> [5] | Europe                      | Registry      | 16963                 | 7.7                                           | -                                                        |
|                           | Southern Europe             | Registry      | 4925                  | 8.5                                           | -                                                        |
|                           | Northern and Western Europe | Registry      | 3444                  | 8.9                                           | -                                                        |
|                           | Central and Eastern Europe  | Registry      | 1061                  | 1.8                                           | -                                                        |
| <b>Aksamit, 2017</b> [6]  | USA                         | Registry      | 1826                  | 10%                                           | -                                                        |
| <b>Kim, 2021</b> [136]    | Japan                       | Survey        | -                     | -                                             | 19.6                                                     |
|                           | South Korea                 | Survey        | -                     | -                                             | 37.8                                                     |
|                           | Singapore                   | Survey        | -                     | -                                             | 76.6                                                     |
|                           | Taiwan                      | Survey        | -                     | -                                             | 37.8                                                     |
| <b>Dhar, 2019</b> [7]     | India                       | Registry      | -                     | -                                             | 3.6                                                      |
| <b>Visser, 2019</b> [143] | Australia                   | Registry      | 589                   | 4                                             | -                                                        |
